# Supplementary material for: Organophilic graphene nanosheets as a promising nanofiller for bio-based polyurethane nanocomposites: investigation of the thermal, barrier and mechanical properties
Source: Royal Society of Chemistry journal article supplement (doi:10.1039/c9nj03300a), 2019-01-01
Supplement: c9nj03300a1.pdf [file c9nj03300a1.pdf]

**Electronic Supplementary Information for**

**Organophilic Graphene Nanosheets as promising nanofiller for bio-based polyurethane nanocomposite: Investigation of Thermal, Barrier and Mechanical properties**

*Mohammed Majdoub,<sup>a,b</sup> Younes Essamlali<sup>b</sup> Othmane Amadine<sup>b</sup> Ikram Ganetri<sup>b</sup> and Mohamed Zahouily<sup>\*a,b</sup>*

<sup>a</sup>Laboratoire de Matériaux, Catalyse et Valorisations des ressources naturelles, Faculté des Sciences et Techniques, Université Hassan II, Mohammedia B. P. 146, 20650, Morocco.

<sup>b</sup>MAScIR Foundation, VARENA Center, Rabat Design, Rue Mohamed El Jazouli, Madinat Al Irfane 10100 Rabat, Morocco.

*\*Corresponding author:* E-mail: [mzahouily@gmail.com](mailto:mzahouily@gmail.com); [m.zahouily@mascir.com](mailto:m.zahouily@mascir.com)

Tel. +212661416359

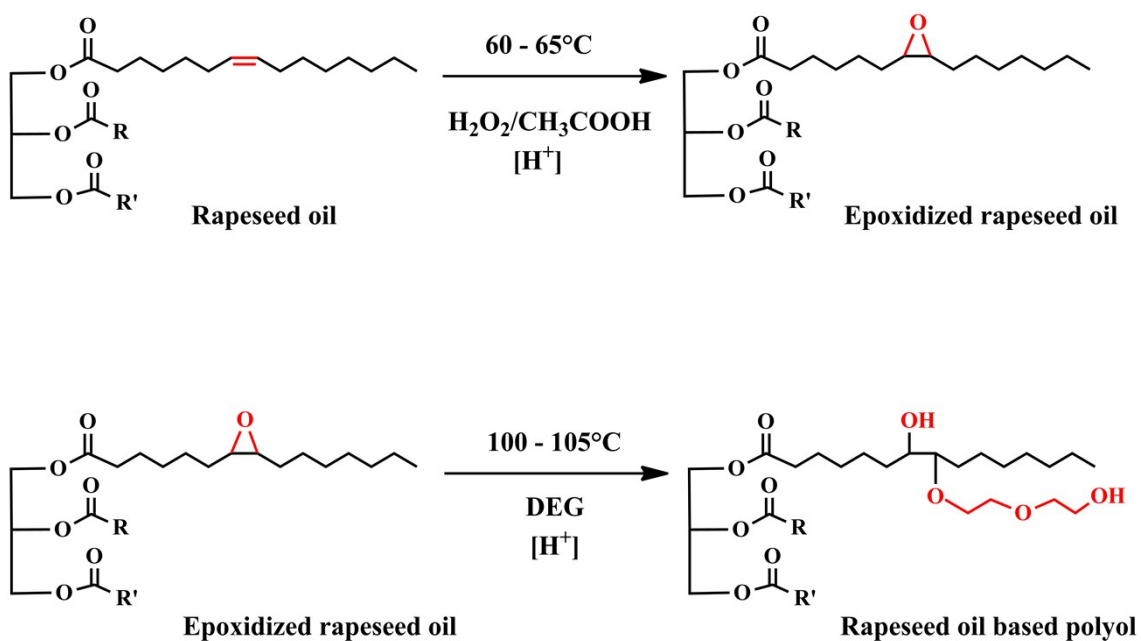

**Scheme.S1.** Epoxidation and oxirane ring-opening processes. R, R' - fatty acid chains.

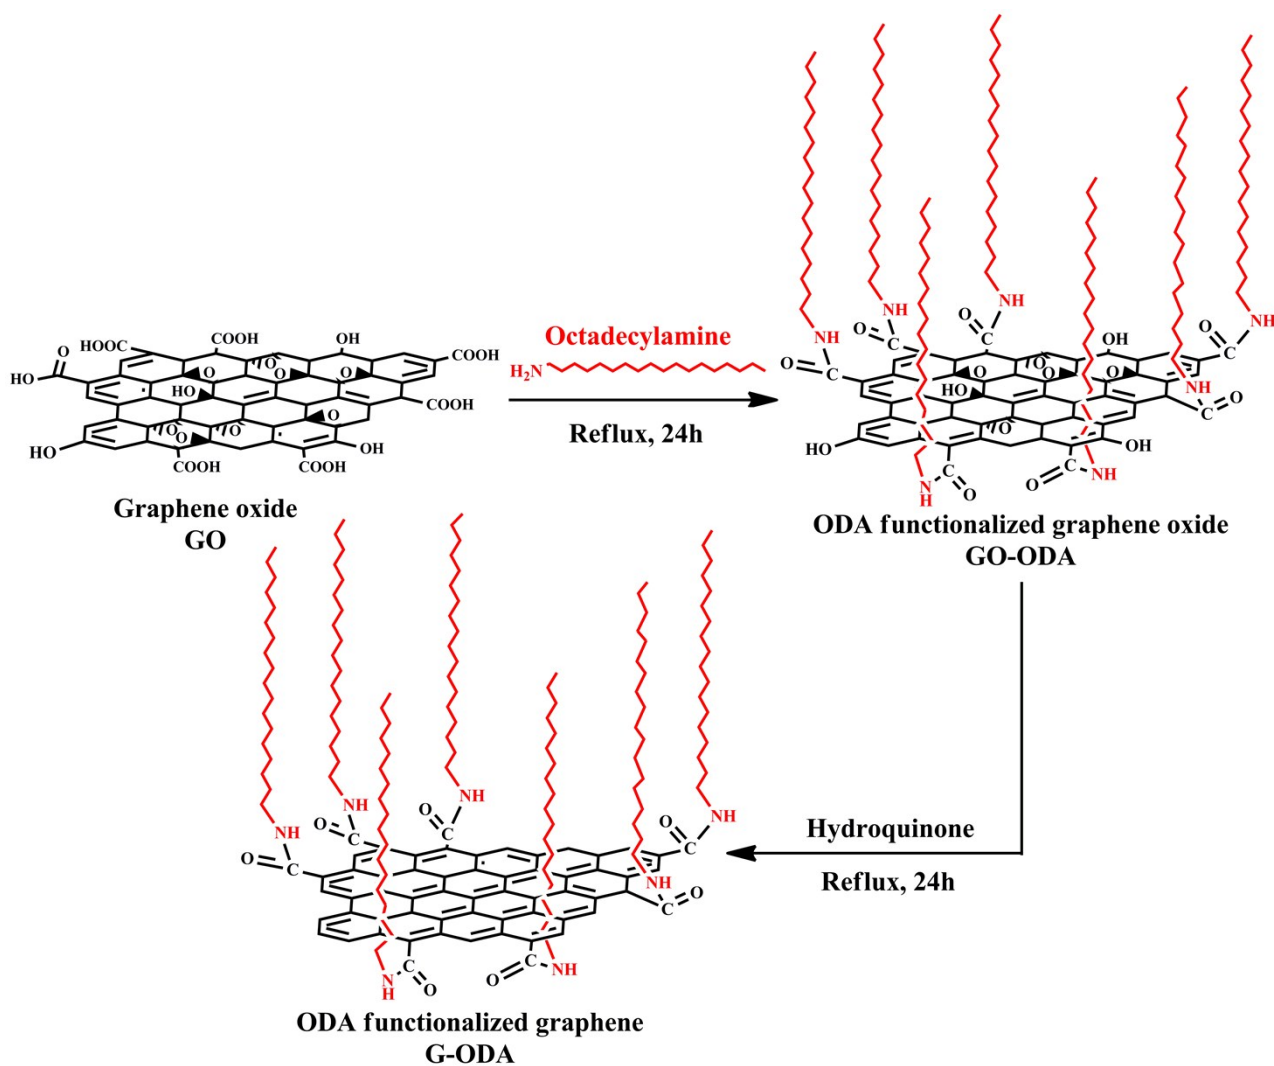

**Scheme.S2.** Proposed structure of the prepared graphene based materials.

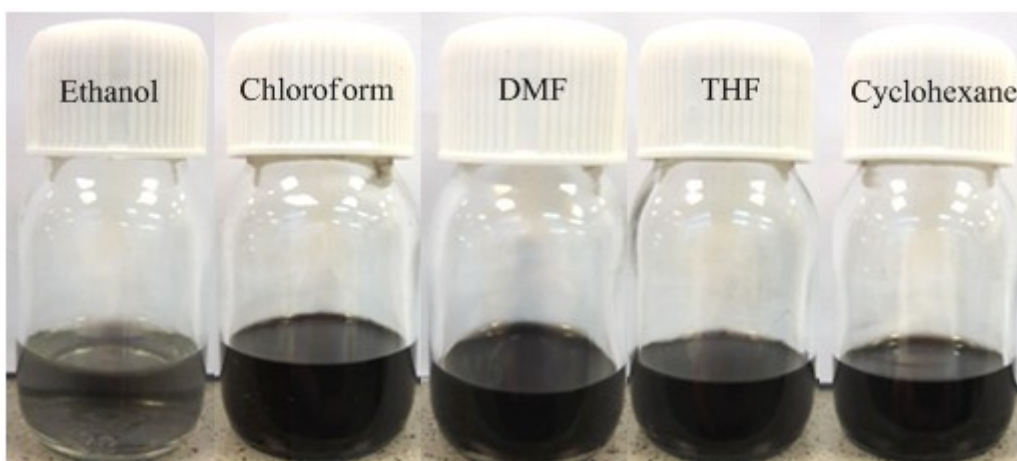

**Fig.S1.** Digital photos of G-ODA suspensions in different solvents

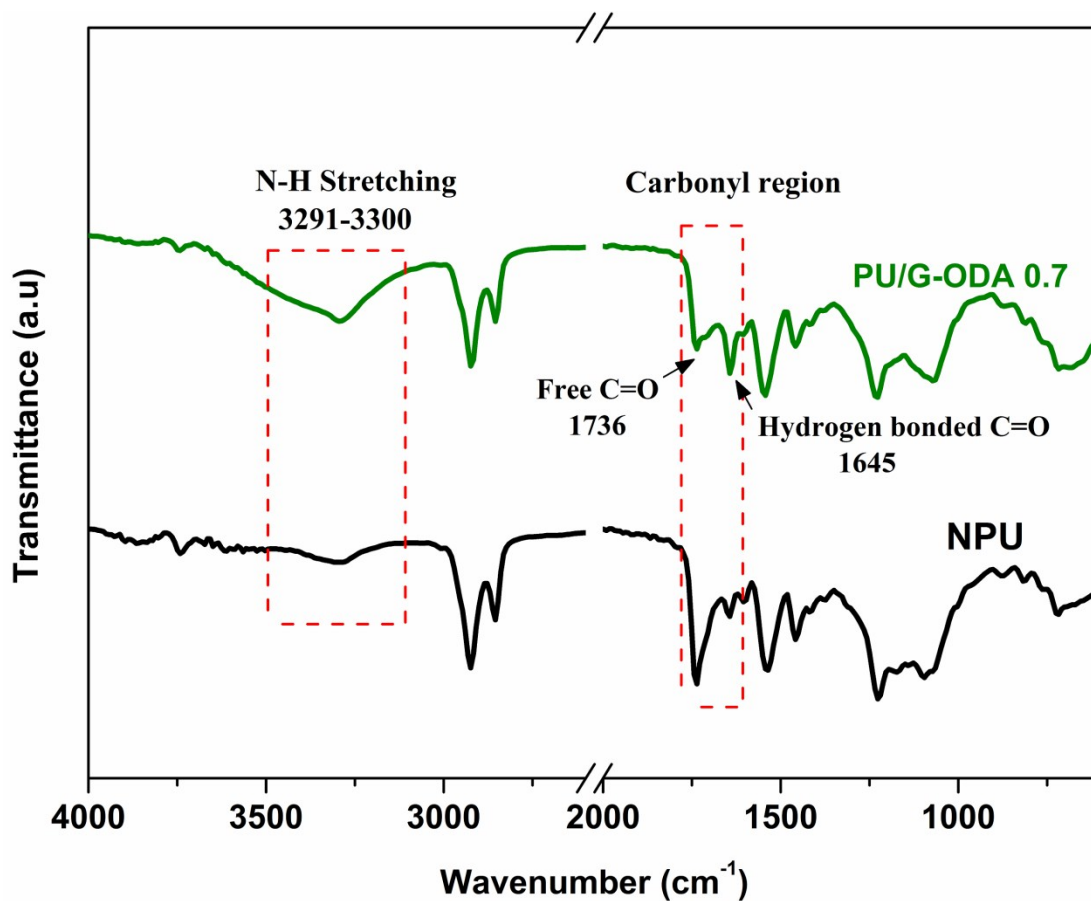

**Fig.S2.** FTIR spectrum of NPU and PU/G-ODA 0.7 showing the variation of band intensity in the carbonyl region and N-H stretching band.

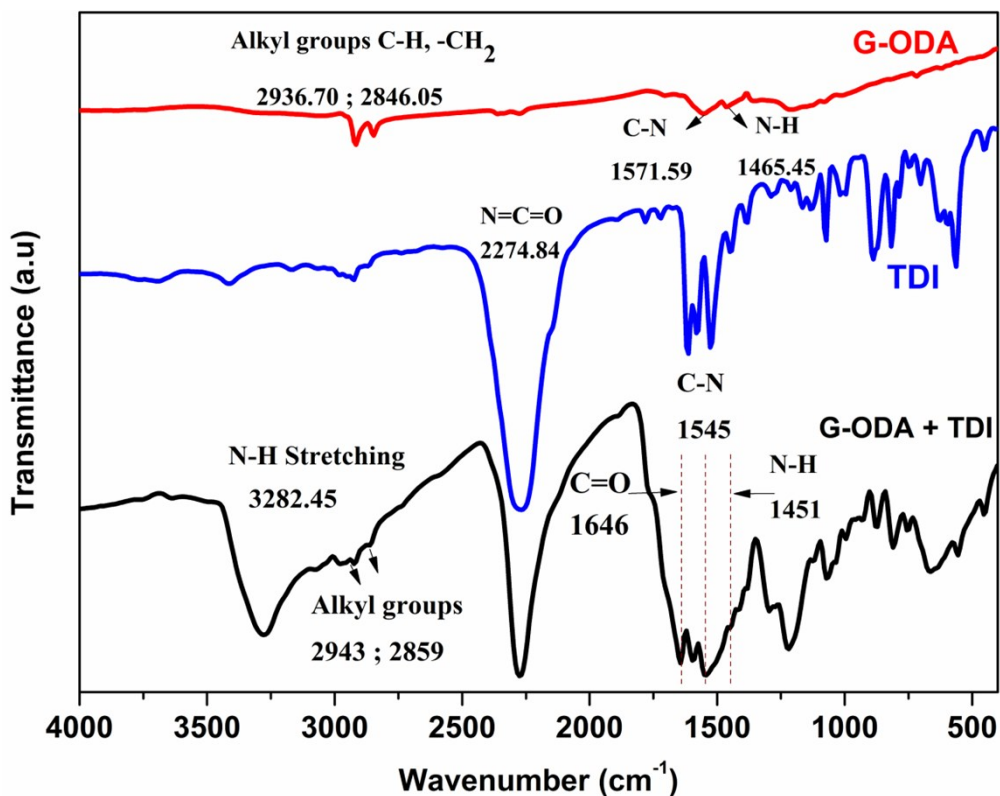

Fig.S3. FTIR spectrum of the control sample (G-ODA + TDI)

Table S2.  $T_g$  and  $T_m$  values of the prepared nanocomposites films

| Film code    | $T_g$ (°C) | $T_m$ (°C) |
|--------------|------------|------------|
| NPU          | -20.24     | 72.65      |
| PU/G-ODA 0.1 | -19.94     | 73.16      |
| PU/G-ODA 0.3 | -17.95     | 74.39      |
| PU/G-ODA 0.5 | -14.37     | 77.58      |
| PU/G-ODA 0.7 | -12.91     | 80.23      |

Table S3. Contact angle measurements of the prepared nanocomposite films

| Film code    | Contact angle (deg) |
|--------------|---------------------|
| NPU          | 72.1±3.6            |
| PU/G-ODA 0.1 | 89.3±5.1            |
| PU/G-ODA 0.3 | 96.2±4.2            |
| PU/G-ODA 0.5 | 103.2±6.3           |
| PU/G-ODA 0.7 | 113.2±5.8           |
